# Supplementary material for: New meso-substituted corroles possessing pentafluorophenyl groups – synthesis and spectroscopic characterization
Source: Royal Society of Chemistry journal article supplement (doi:10.1039/c4cp05648e), 2015-01-01

**Electronic Supplementary Material (ESI)**

**This journal is © The Royal Society of Chemistry 2015**

**New *meso*-substituted corroles possessing pentafluorophenyl groups  
- Synthesis and spectroscopic characterization**

Bartosz Bursa,<sup>1</sup> Bolesław Barszcz,<sup>2</sup> Waldemar Bednarski,<sup>2</sup> Jan Paweł Lewtak,<sup>3</sup> Dominik Koszelewski,<sup>3</sup> Olena Vakuliuk,<sup>3</sup> Daniel T. Gryko,<sup>3\*</sup> Danuta Wróbel<sup>1\*</sup>

<sup>1</sup> Faculty of Technical Physics, Institute of Physics, Poznan University of Technology,  
60-965 Poznań, Poland

<sup>2</sup> Institute of Molecular Physics, Polish Academy of Sciences, 60-179 Poznań, Poland

<sup>3</sup> Institute of Organic Chemistry, Polish Academy of Sciences, 01-224 Warsaw, Poland

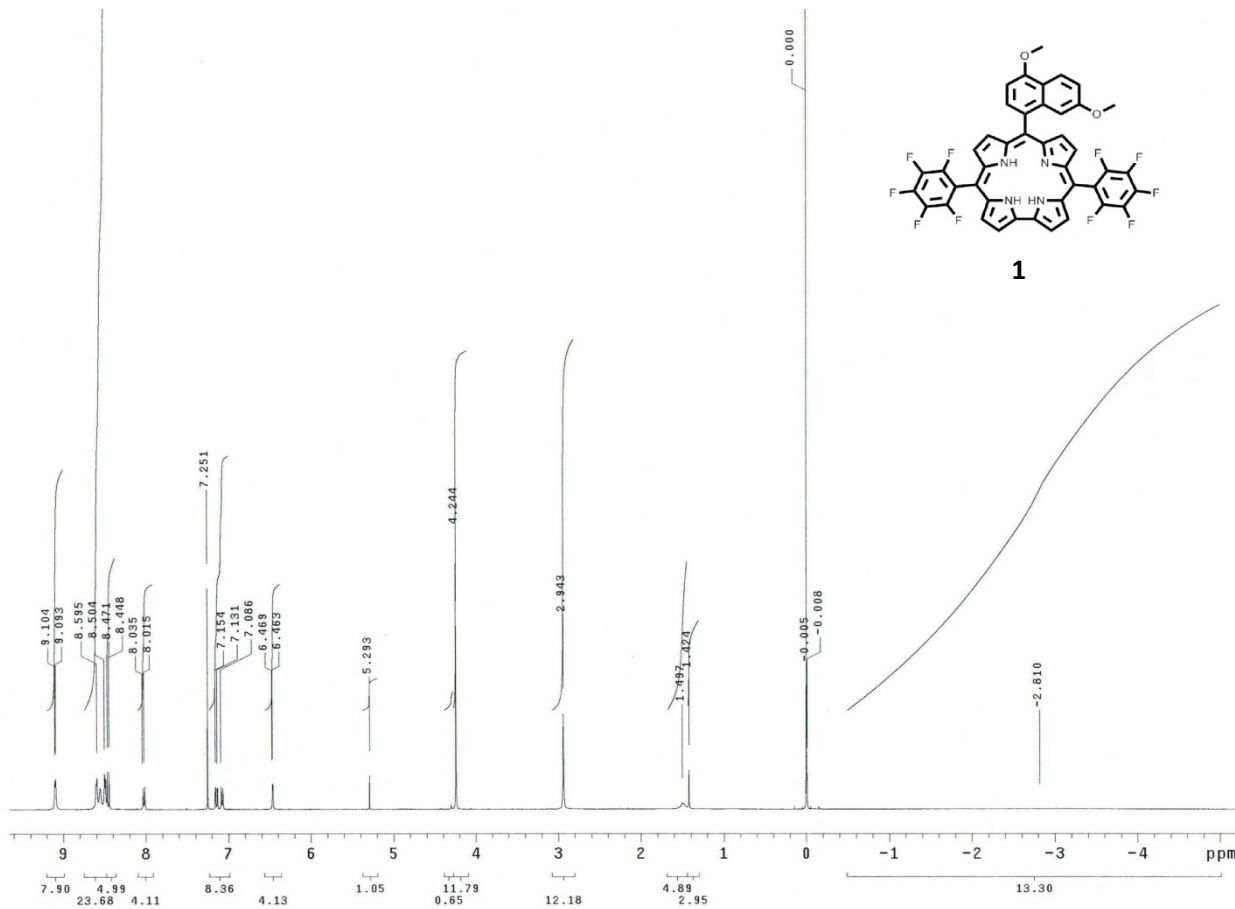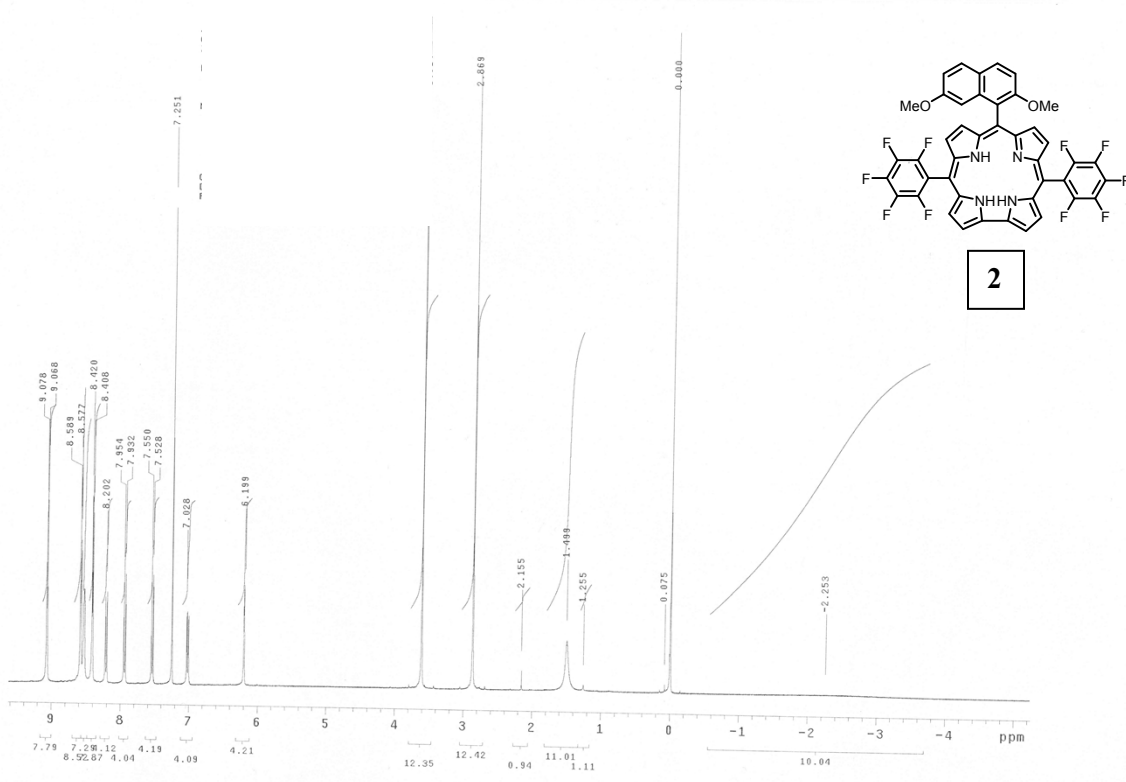

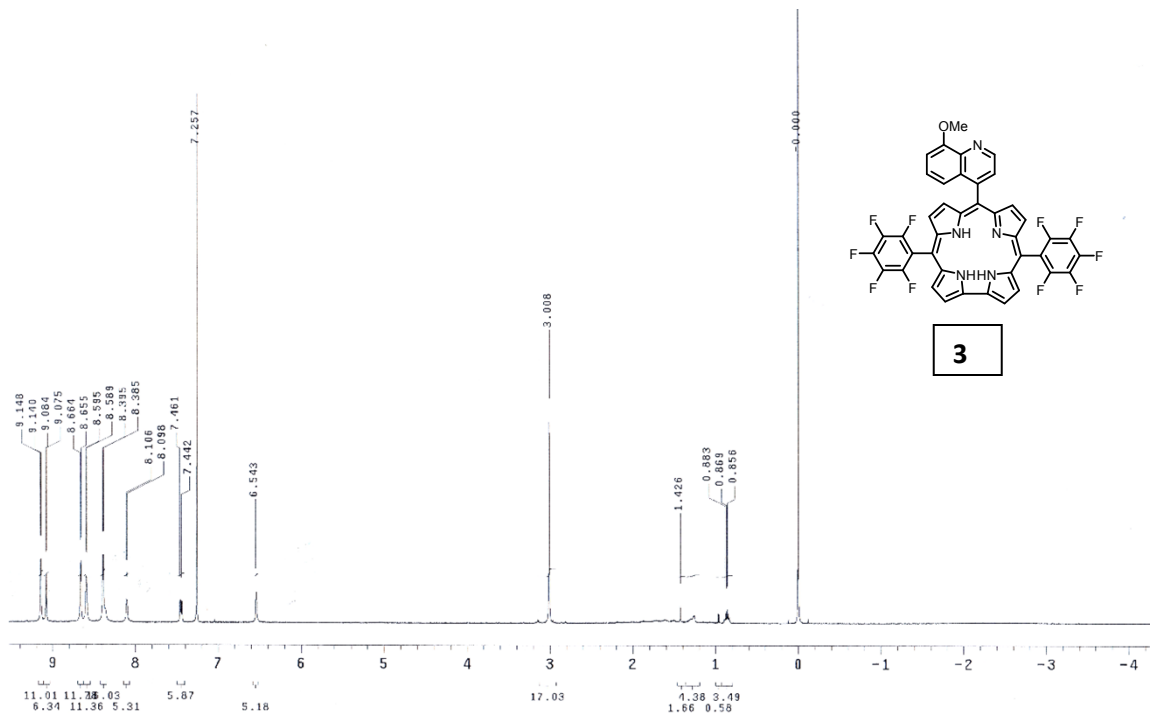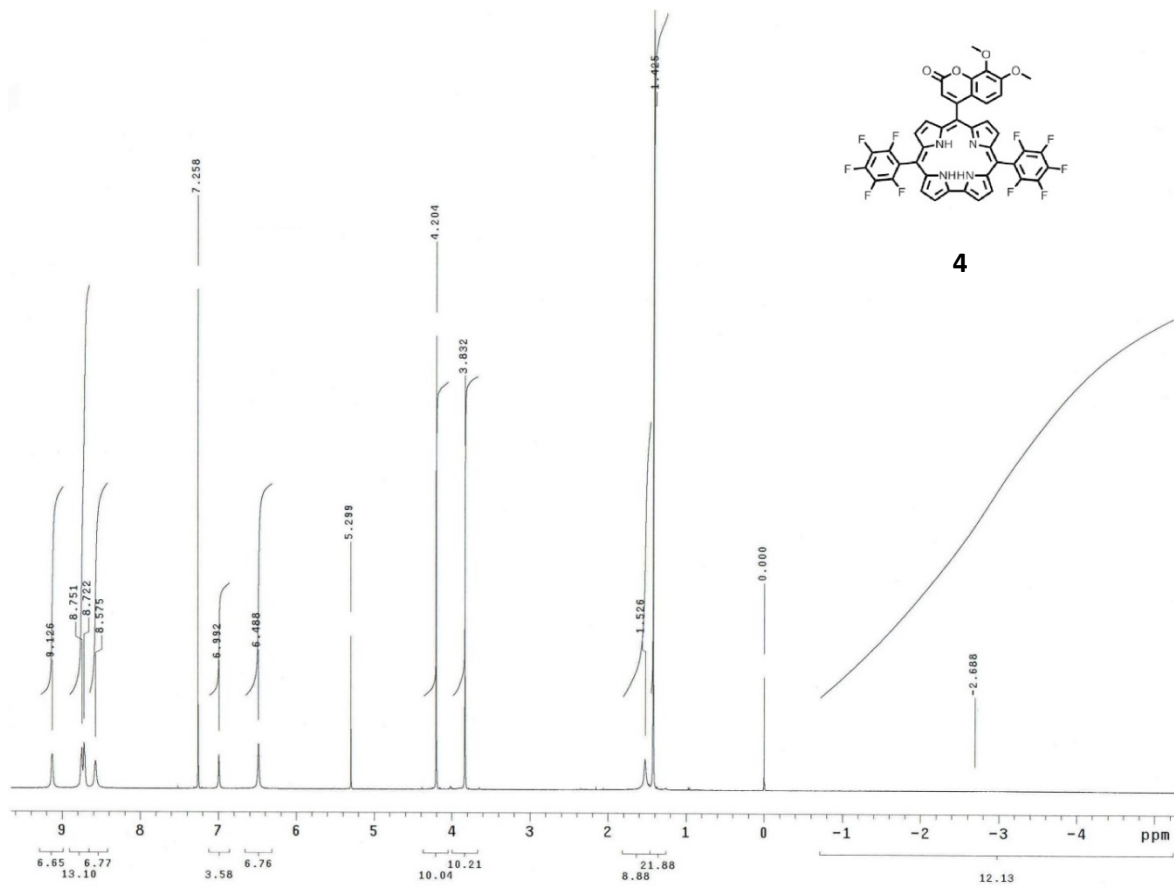

Supplement: c4cp05648e1.pdf [file c4cp05648e1.pdf]
